# A compartment size dependent selective threshold limits mutation accumulation in hierarchical tissues

Dániel Grajzel<sup>a,b</sup>, Imre Derényi<sup>b,c,1</sup>, and Gergely J. Szöllősi<sup>a,b,d,1,2</sup>

<sup>a</sup>MTA-ELTE “Lendület” Evolutionary Genomics Research Group, Pázmány P. stny. 1A, H-1117 Budapest, Hungary; <sup>b</sup>Department of Biological Physics, Eötvös Loránd University, Pázmány P. stny. 1A, H-1117 Budapest, Hungary; <sup>c</sup>MTA-ELTE Statistical and Biological Physics Research Group, Hungarian Academy of Sciences, H-1117, Budapest, Hungary.; <sup>d</sup>Evolutionary Systems Research Group, Centre for Ecological Research, Hungarian Academy of Sciences, 8237 Tihany, Hungary

This manuscript was compiled on December 13, 2019

**Cancer is a genetic disease fueled by somatic evolution. Hierarchical tissue organization can slow somatic evolution by two qualitatively different mechanisms: by cell differentiation along the hierarchy “washing out” harmful mutations (Nowak et al. 2003, Werner et al. 2013) and by limiting the number of cell divisions required to maintain a tissue (Derényi and Szöllősi 2017). Here we explore the effects of compartment size on somatic evolution in hierarchical tissues by considering cell number regulation that acts on cell division rates such that the number of cells in the tissue has the tendency to return to its desired homeostatic value. Introducing mutants with a proliferative advantage we demonstrate the existence of a third fundamental mechanism by which hierarchically organized tissues are able to slow down somatic evolution. We show that tissue size regulation leads to the emergence of a threshold proliferative advantage, below which mutants cannot persist. We find that the most significant determinant of the threshold selective advantage is compartment size, with the threshold being higher the smaller the compartment. Our results demonstrate that in sufficiently small compartments even mutations that confer substantial proliferative advantage cannot persist, but are expelled from the tissue by differentiation along the hierarchy. The resulting selective barrier can significantly slow down somatic evolution and reduce the risk of cancer by limiting the accumulation of mutations that increase the proliferation of cells.**

Somatic Evolution | Tissue hierarchies | Cancer Evolution | Physics of Cancer

**T**umors develop as genetic and epigenetic alterations spread through a population of premalignant cells and some cells accumulate changes over time that enable them and their descendants to persist within tissues (1, 2). From an evolutionary perspective each tumor is an independent realization of a common reproducible evolutionary process involving “adaptive” mutations that are preferentially selected by the tumor environment. This process is clonal, which means that a subset of mutations termed “drivers” confer clonal growth advantage and they are causally implicated in cancer development.

A large body of work (2–5) has focused on understanding clonal evolution of an initially homogeneous populations of identical cells, a subset of which progress toward cancer as they accrue driver mutations. Beerenwinkel et al. (6), for instance, considered the Wright-Fisher process (a homogeneous population of initially identical cells) to explore the basic parameters of this evolutionary process and derive an analytical approximation for the expected waiting time to the cancer phenotype and highlighted the relative importance of selection over both the size of the cell population at risk and the mutation rate.

Self-renewing tissues, which must generate a large number

of cells during an individual’s lifetime and in which tumors typically arise, are comprised of a hierarchy of progressively differentiated cells and, as a result, are not homogeneous populations of identical cells. There is empirical evidence (7–9) and theoretical rationale (10–12) that such hierarchical tissue architecture has profound effect on neoplastic progression. Theoretical work has demonstrated that hierarchically organized tissues suppress tumor evolution by limiting the accumulation of somatic mutations in two fundamentally different ways, as follows:

As described in a seminal paper by Nowak et al. (11) the linear flow from stem cells to differentiated cells to apoptosis in a spatially explicit, strictly linear organization has the property of canceling out selective differences. Nowak et al. considered a system, where only asymmetric cell divisions are allowed, i.e., after each cell division one of the daughter cells differentiates to the next level of the hierarchy pushing all cells at higher levels further along the hierarchy (see Fig. 1a). In this idealized construction mutations, irrespective of how much they increase division rate, are invariably “washed out” unless they occur in the stem cell at the root of the hierarchy. In a more general setting, where symmetric divisions are allowed, the strength of this “washing out” effect can be quantified by introducing the self-renewal potential of cells. The self-renewal potential is defined as the logarithm of the ratio between the

## Significance Statement

Renewed tissues of multicellular organism accumulate mutations that lead to ageing and cancer. To mitigate these effects self-renewing tissues produce cells along differentiation hierarchies, which have been shown to suppress somatic evolution both by limiting the number of cell divisions, and thus reducing mutational load, and by differentiation “washing out” mutations. Our analytical results reveal the existence of a third mechanism: a compartment size dependent threshold in proliferative advantage, below which mutations cannot persist, but are rapidly expelled from the tissue by differentiation. In sufficiently small compartments the resulting selective barrier can greatly slow down somatic evolution and reduce the risk of cancer by preventing the accumulation of mutations even if even they confer substantial proliferative advantage.

ID and GJSz designed the study, DG, ID and GJSz carried out calculations and wrote the paper.

No conflict of interests.

<sup>1</sup>ID and GJSz contributed equally to this work.

<sup>2</sup>To whom correspondence should be addressed. E-mail: ssolo@elte.hu

47 rate of cell divisions that increase the number of cells at a  
 48 given level of the hierarchy (division producing two cells at the  
 49 same level) and the rate of events that result in the reduction  
 50 at the level (division producing two differentiated cells that  
 51 move higher up in the hierarchy or cell death). In healthy  
 52 homeostatic tissues the self-renewal potential of stem cells  
 53 is zero (corresponding to equal rates of differentiation and  
 54 self-renewal), while for differentiated cells it is always negative,  
 55 as these cells have an inherent proliferative disadvantage as a  
 56 result of which they are eventually “washed out” of the tissue  
 57 from cells differentiating from lower levels of the hierarchy. In  
 58 the following, lower (higher) refers to levels closer to (further  
 59 away from) the stem cell compartment.

60 More recently, Derényi and Szöllösi (12) showed that in self-  
 61 renewing tissues hierarchical organization provides a robust  
 62 and nearly ideal mechanism to limit the divisional load (the  
 63 number of divisions along cell lineages) of tissues and, as a  
 64 result, minimize the accumulation of somatic mutations.  
 65 The theoretical minimum number of cell divisions can be  
 66 very closely approached: as long as a sufficient number of  
 67 progressively slower dividing cell types towards the root of the  
 68 hierarchy are present, optimal self-sustaining differentiation  
 69 hierarchies can produce  $N$  terminally differentiated cells during  
 70 the course of an organism’s lifetime from a single precursor  
 71 with no more than  $\log_2(N) + 2$  cell divisions along any lineage.

72 Here, we examine the effect of compartment size by intro-  
 73 ducing interaction among cells in the form of cell number  
 74 regulation, which acts on the cell division rates such that the  
 75 number of cells at each hierarchical level of the tissue has  
 76 the tendency to return to its desired homeostatic value. We  
 77 consider a single (non stem cell) level of the hierarchy that  
 78 is renewed from below by cell differentiation. We introduce  
 79 mutants with a proliferative advantage, i.e., mutants with a  
 80 positive self-renewal potential. As detailed below, using both  
 81 simulations and an approximation adopted from nonequilib-  
 82 rium statistical physics, we find that under a wide range of  
 83 parameters a third fundamental mechanism exists by which hi-  
 84 erarchically organized tissues can slow down somatic evolution  
 85 and delay the onset of cancer.

## 86 1. Results

87 We consider level  $k > 0$  of a general differentiation hierarchy  
 88 that is renewed by cell differentiation from level  $k - 1$  below.  
 89 The tissue dynamics is described by the rates of asymmetric  
 90 differentiation ( $\circ\uparrow$ ), symmetric division with differentiation  
 91 ( $\uparrow\uparrow$ ), symmetric division ( $\circ\circ$ ), and cell death ( $\times$ ) (see Fig. 1 b  
 92 and c).

93 At homeostasis (i.e., when the number of cells,  $N_k$ , at each  
 94 level coincides with its homeostatic value,  $N_k^0$ ) the evolutionary  
 95 dynamics of level  $k$  is determined by the per cell rate  $r_k^+ = r_k^{\circ\circ}$   
 96 of cell number increase through symmetric cell division ( $\circ\circ$ ),  
 97 the per cell rate  $r_k^- = r_k^{\uparrow\uparrow} + r_k^{\times}$  of cell number decrease through  
 98 either symmetric division with differentiation ( $\uparrow\uparrow$ ) or cell death  
 99 ( $\times$ ), and the per level rate  $\delta_k^+ = \delta_{k-1}^+ = (2r_{k-1}^{\uparrow\uparrow} + r_{k-1}^{\circ\uparrow})N_{k-1}$   
 100 of cell number increase through differentiation from below. In  
 101 the following, we focus on a single (non stem cell) level, and  
 102 drop index  $k$  for brevity. Homeostasis implies that the rates  
 103 satisfy the stationarity condition

$$104 \quad (r^- - r^+) N^0 = \delta^+. \quad [1]$$

105 To model tissue size regulation we consider a generic cell

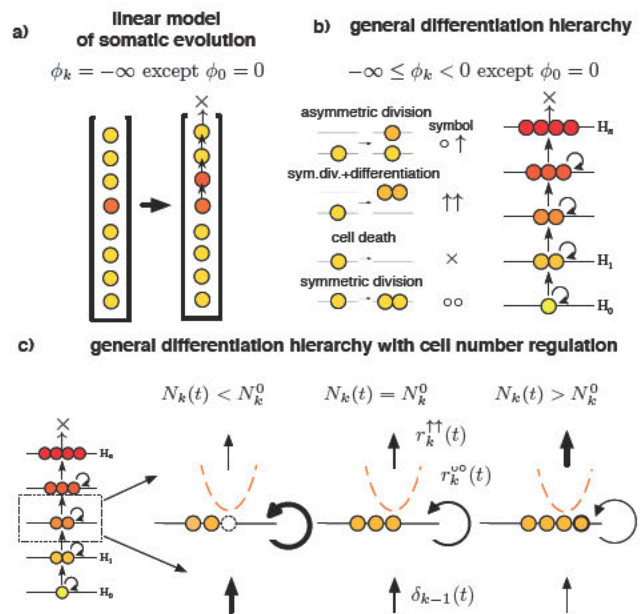

Fig. 1. Self-renewing tissue comprised of a hierarchy of progressively differentiated cells can suppress somatic evolution. a) The linear process of somatic evolution considers a strict linear organization, where after each cell division one of the daughter cells differentiates to the next level pushing all cells above further along and the top most cell is lost from the system. Such an idealized construction, where self-renewal at individual levels of the hierarchy is not allowed has a minimal self-renewal potential  $\phi_k = -\infty$ , with the exception of the stem cell level at the root of the hierarchy with  $\phi_0 = 0$ . This has the effect of canceling out selective differences between cells, i.e., any non stem cell, regardless of how large its division rate is, will be “washed out” of the tissue by cell differentiating from below. b) General differentiation hierarchies are characterized by intermediate values of the self-renewal potential with the exception of the stem cell. In such systems, in the absence of cell number regulation, any mutant with a proliferative advantage, i.e., a positive self-renewal potential, will spread exponentially if it does not go extinct stochastically. c) We introduce cell number regulation that changes the rate of different events such that the strength and direction of the regulation depends on the difference between the number of cells present at a given time  $N_k(t)$  and the homeostatic number  $N_k^0$  in a manner equivalent to being in a quadratic potential (cf. Eq. (3)). As described in the text, this leads to the emergence of a positive threshold proliferative advantage below which mutants cannot persist.

number-dependent regulation scheme that acts to return the  
 number of cells in the compartment to its homeostatic value.  
 Biologically such a regulation scheme corresponds to, e.g.,  
 the local concentration of a regulatory signal that conveys  
 information on the density of cells in a compartment. To  
 formalize cell-number regulation we introduce cell number-  
 dependent multiplicative rate modifiers  $\rho^+(N)$  and  $\rho^-(N)$   
 for, respectively, events that increase and decrease cell number.  
 Maintaining homeostasis requires that  $\rho^+(N) > 1$  and  
 $\rho^-(N) < 1$  if  $N < N^0$ ; and  $\rho^+(N) < 1$  and  $\rho^-(N) > 1$  if  
 $N > N^0$ . These rate modifiers define an abstract confining  
 potential  $U(N)$  up to an additive constant:

$$U(N+1) - U(N) = -\log \frac{\rho^+(N)}{\rho^-(N+1)}, \quad [2]$$

with a minimum at  $N = N^0$ . For mathematical convenience,  
 we approximate the confining potential with a parabolic (har-  
 monic) form:

$$U(N) = \frac{1}{2} \beta \frac{(N - N^0)^2}{N^0}, \quad [3]$$

characterized by a single parameter (potential strength)  $\beta$ .



124 The role of the confining potential is to limit the variance of  
 125 the number of cells to  $N^0/\beta$ . It is this confining potential  
 126 that plays the most significant role in slowing down somatic  
 127 evolution, as shown below.

128 The particular choice of how the confining potential is  
 129 distributed between the cell number increasing and decreasing  
 130 rate modifiers (to satisfy Eq. (2)) has only marginal effect on  
 131 the dynamics. Here, for simplicity, we make the symmetric  
 132 choice:

$$133 \quad \rho^+(N) = e^{-\frac{1}{2}\beta \frac{N-N^0}{N^0}} \quad \text{and} \quad \rho^-(N) = e^{\frac{1}{2}\beta \frac{N-N^0}{N^0}}. \quad [4]$$

135 We measure time in units of  $1/(2r^-N^0)$ . Thus, the life-  
 136 time of the tissue  $T$  is identical to the expected number of  
 137 differentiated cells that would be produced by this level under  
 138 homeostatic conditions during the individual's lifetime, if all  
 139 the cell number decreasing events were symmetric cell differen-  
 140 tiations. As the asymmetric differentiations ( $\circ\uparrow$ ) do not have  
 141 any influence on the number of cells of this level, we set its  
 142 rate ( $r^{\circ\uparrow}$ ) to zero for convenience.

143 The self-renewal potential of the cells in a healthy homeo-  
 144 static tissue is defined as

$$145 \quad \phi = \ln \frac{r^+}{r^-} \leq 0, \quad [5]$$

146 which converges to  $-\infty$  as the rate of the ( $\circ\circ$ ) events ap-  
 147 proaches zero.

148 We introduce mutants with an elevated rate of divisions  
 149 that increase cell number,  $r_m^+$ , such that it exceeds the rate of  
 150 cell number decrease:  $r_m^+ > r^-$ . This corresponds to a positive  
 151 self-renewal potential for mutant cells:

$$152 \quad \phi_m = \ln \frac{r_m^+}{r^-} > 0. \quad [6]$$

153 In the absence of cell number regulation (i.e.,  $\beta = 0$ ) a  
 154 single such mutant either goes extinct stochastically, or spreads  
 155 exponentially with probability (13)

$$156 \quad S_m = 1 - \frac{r^-}{r_m^+} = 1 - e^{-\phi_m}. \quad [7]$$

157 In the following we use  $S_m$  to parametrize the selective advan-  
 158 tage of mutants. We note that in the absence of differentia-  
 159 tion from below (i.e.,  $\delta^+ = 0$ ), for fixed population size (i.e.,  
 160  $\beta \rightarrow \infty$ ), for all but extremely small populations or nearly  
 161 neutral mutations,  $S_m$  also corresponds to the probability of  
 162 fixation of the mutant (14–16).

Denoting the number of mutant cells by  $N_m$  and wild type  
 cells by  $N_w$  the dynamics is described by the transition rates

$$163 \quad \begin{aligned} k_m^+(N_m, N_w) &= N_m r_m^+ \rho^+(N_m + N_w), \\ k_m^-(N_m, N_w) &= N_m r^- \rho^-(N_m + N_w), \\ k_w^+(N_m, N_w) &= (N_w r^+ + \delta^+) \rho^+(N_m + N_w), \\ k_w^-(N_m, N_w) &= N_w r^- \rho^-(N_m + N_w), \end{aligned} \quad [8]$$

where the lower index (m or w) denotes the type of the cell  
 (mutant or wild, respectively), and the upper index indicates  
 whether the number of cells of the given type is increased  
 (+) or decreased (-). The transition rates can be shown to

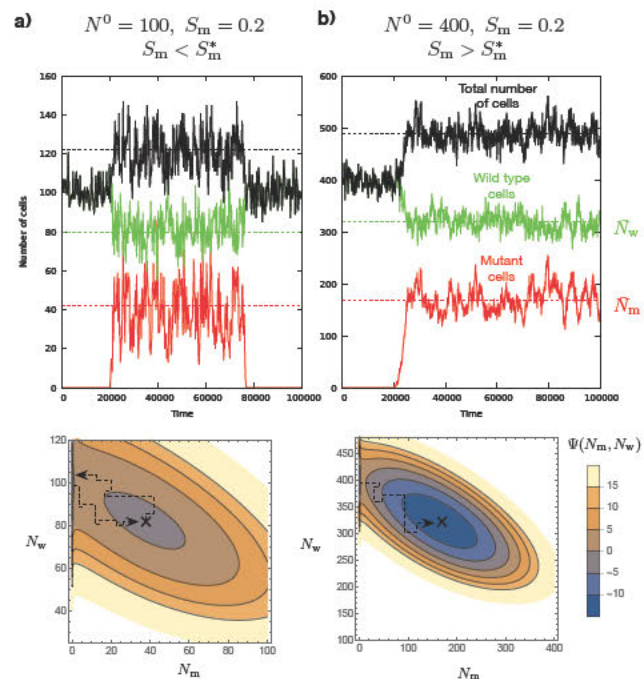

**Fig. 2. Mutants go extinct under a threshold proliferation advantage.** The continuous lines show the size of the mutant (red) and wild type (green) populations and their combined number (black) during the simulation. The dashed lines correspond to the theoretical mean population sizes in the quasi-stationary state. (a) if the proliferation advantage of the mutant is below the threshold the mutant will rapidly escape from the shallow quasi-stationary state and go extinct. On the bottom panels the black  $\times$  on the continuous approximation of the potential marks the quasi-stationary state. Parameters are:  $N^0 = 100, \beta = 1, r^+ = 0$ , and  $S_m = 0.2$  is below the threshold  $S_m^* = 0.34$ . (b) Increasing the compartment size to  $N^0 = 400$  the potential well becomes deeper and the threshold proliferation advantage correspondingly smaller  $S_m^* = 0.17$ , allowing a mutant with the same advantage of  $S_m = 0.2$  to persist in the tissue during the individual's lifetime.

correspond to a reversible Markov process in the effective potential

$$164 \quad \begin{aligned} \Psi(N_m, N_w) &= -N_m \phi_m + \ln N_m - N_w \phi \\ &+ \ln \frac{\Gamma(N_w + 1)}{\Gamma(N^0(e^{-\phi} - 1) + N_w)} \\ &+ U(N_m + N_w), \end{aligned} \quad [9]$$

where  $\Gamma$  represents the gamma function.

165 The continuous interpolation of this potential is shown in  
 166 the bottom panels of Fig. 2 a and b for different parameters.  
 167 An effective potential, such as Eq. (9), can always be defined  
 168 if the mutant and wild type transition rates depend only on  
 169 the number of cells of the given type, and cell number regula-  
 170 tion – which acts as a multiplicative modifier of these rates –  
 171 depends only on the total number of cells (see Supplementary  
 Appendix).

172 Here we are concerned with cell number regulation that can  
 173 be described by a confining potential with a single minimum,  
 174 for which Eq. (3) is the parabolic approximation. In this case  
 175 the presence of size regulation (i.e.,  $\beta > 0$ ) leads to a quasi-  
 176 stationary state in which the mean number of mutant  $\bar{N}_m$  and  
 177 wild type  $\bar{N}_w$  cells can be determined to good approximation  
 178 by solving:

$$179 \quad \frac{k_m^+(N_m, N_w)}{k_m^-(N_m, N_w)} = \frac{k_w^+(N_m, N_w)}{k_w^-(N_m, N_w)} = 1, \quad [10]$$



which gives:

$$\bar{N}_m \approx N^0 \left( \frac{S_m}{1 - r^+/r_m^+} + \frac{\phi_m}{\beta} \right) = N^0 \left( \frac{e^{\phi_m} - 1}{e^{\phi_m} - e^{\phi}} + \frac{\phi_m}{\beta} \right),$$

$$\bar{N}_w \approx N^0 \left( \frac{1 - S_m}{1 - r^+/r_m^+} + \frac{\delta^+}{N^0 r^-} \right) = N^0 \left( \frac{1 - e^{\phi}}{e^{\phi_m} - e^{\phi}} \right). \quad [11]$$

As illustrated in Fig. 2, the behavior of this quasi-stationary state can be divided into two regimes based on the value of the proliferative advantage  $S_m$  of the mutant. Below a threshold proliferative advantage  $S_m^*$  mutants, even if they initially spread (i.e., avoid early stochastic extinction with probability  $S_m$ ) will nonetheless rapidly go extinct and, as a result, have vanishing probability to persist in the tissue throughout its lifetime. Above this threshold, however, if a single mutant avoids early stochastic extinction, with probability  $S_m$ , a population of its descendants will persist with near certainty in the tissue throughout its lifetime.

The characteristic residence time of a population of mutants that have initially spread corresponds to the mean exit time  $\tau$  of escape from the quasi-stationary state described above. Following the approach described by Gardiner (17) and Derényi et al. (18) an analytical approximation can be derived for  $\tau$  of the general form (for details of see the Supplementary Appendix):

$$\tau = \tau_0 e^{\Delta\Psi}, \quad [12]$$

where  $\tau_0$  is the reciprocal of the attempt frequency and  $\Delta\Psi = \Psi(1, N^0) - \Psi(\bar{N}_m, \bar{N}_w)$  is the height of the potential barrier for the escape from the quasi-stationary state (cf. Fig. 2).  $\Delta\Psi$  scales linearly with  $N^0$  (for large  $N^0$ ), corresponding to an exponential increase in  $\tau$ . In contrast,  $\tau_0$ , which depends only on the local geometries of the potential well and barrier, is proportional to  $(N^0)^{3/2}$ .

Using the mean exit time for escape from the quasi-stationary state, the probability  $P$  that a single mutant persists (i.e., first spreads, and then avoids escape) for the lifetime of the individual can be expressed as:

$$P = S_m e^{-T/\tau}. \quad [13]$$

As show in Fig. 3a top panel, the above approximation for the escape time  $\tau$  is highly accurate, and it depends very sharply on the selective advantage of mutants. This results in a well defined threshold selective advantage (cf. Fig. 3a bottom panel) below which mutants, even if they avoid early stochastic extinction, will rapidly go extinct, i.e., will be washed out by cells differentiating from below. Furthermore, the threshold value depends only weakly on the value of  $\beta$  for reasonably strong cell number regulation, i.e., for  $\beta > 1$  corresponding to the variance (in time) of the cell number being smaller than  $N^0$ .

Realistic values for the rates  $r^-$ ,  $r^+$  and  $\delta^+$  can vary greatly depending on tissue type and differentiation state (e.g., in humans long term stem cells of the hematopoietic system divide a few times a year, while in the top layers of epithelial tissues cell divisions occur daily (8, 12)). Under homeostatic conditions the three rates, however, cannot be chosen independently, but must satisfy the stationary condition in Eq. (1). Furthermore, in the context of our model, as is apparent on inspection of  $\Psi$ , the dynamics does not depend on the absolute rates, but only on the ratio  $r^+/r^-$ , the logarithm of which defines the self-renewal potential  $\phi$  (cf. Eq. (5)).

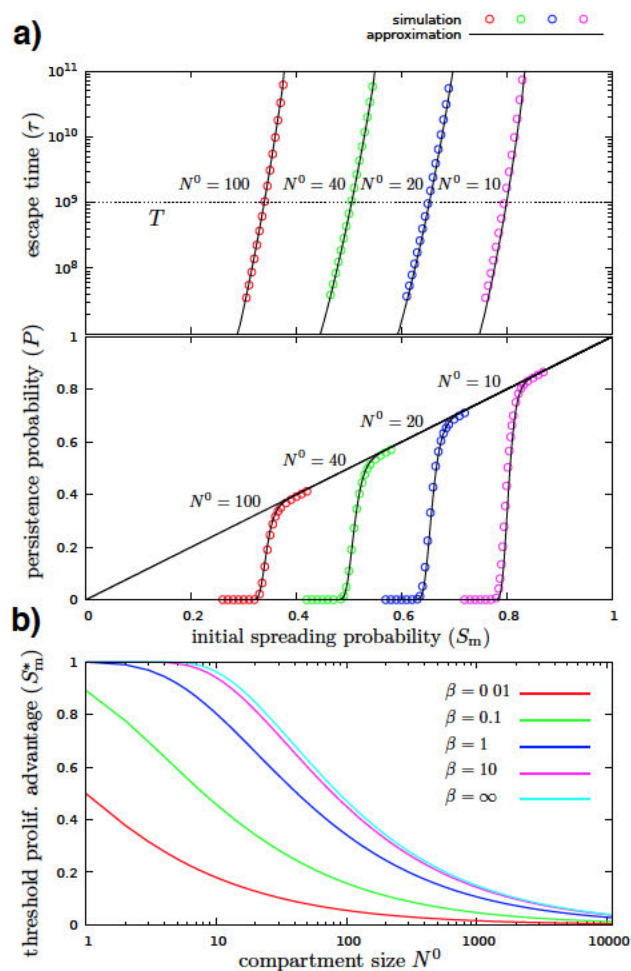

**Fig. 3. There is no somatic evolution under the threshold spreading factor.** (a) In presence of tissue size regulation ( $\beta > 0$ ), below a threshold proliferation advantage  $S_m^*$  mutants rapidly go extinct and, as a result, have vanishing probability to persist in the tissue through its lifetime, while above this threshold, if a single mutant avoids early stochastic extinction, which occurs with probability  $S_m$ , it will persist with near certainty. The diagonal line corresponds to the initial spreading probability, the colored circles show the simulation, and the black continuous curves show the theoretical approximation, for different compartment sizes ( $N^0$ ).  $\beta = 1$ ,  $r^+ = 0$ , and  $T = 10^9$  throughout. (b) The threshold separates the plot into two distinct regimes: below the curve the persistence probability is zero, mutations cannot accumulate; above the curve the mutants that avoid early stochastic extinction, which occurs with probability  $S_m$ , will persist in the tissue during the lifetime of the individual, and mutations can accumulate, leading to neoplastic progression.

Fixing  $r^-$  specifies the absolute time scale, while changing the value of, e.g.,  $r^+$  changes the values of the self-renewal potential  $\phi = \ln(r^+/r^-)$  and the strength of washing out, defined as the fraction of cells being produced by differentiation from below instead of self-renewal:  $\delta^+/(N^0 r^-) = 1 - r^+/r^- = 1 - \exp(\phi)$ . In particular,  $r^+ = 0$ , the default value used in several examples above, corresponds to minimal self-renewal potential ( $\phi = -\infty$ ), and maximal washing out ( $\delta^+/(N^0 r^-) = 1$ ). Increasing values of  $r^+/r^- > 0$  correspond to increasing self-renewal potential and weakening washing out. As shown in Fig. S4, even for strong self-renewal and correspondingly weak washing out the threshold spreading factor can be large in small compartments.



## 247 2. Discussion

248 In classical population genetics models of finite populations, a  
249 mutation is either fixed in the population or lost from it within  
250 a finite length of time. A fundamental result of population  
251 genetics theory is that in constant populations mutations with  
252 a given selective advantage will avoid early stochastic extinction  
253 and fix with a probability independent of population size  
254 and proportional to the selective advantage (14–16). As a  
255 corollary, in the context of somatic evolution Michor et al. (19)  
256 demonstrated that the accumulation of oncogene-activating  
257 mutations (i.e., mutations that provide a proliferative advantage)  
258 that occur at a constant rate per cell division is faster in large  
259 than in small compartments. Consequently, as pointed out by Michor  
260 et al. the classical theory of finite populations of constant size  
261 implies that the organization of self-renewing tissues into many  
262 small compartments, such as the stem cell pools in colonic crypts,  
263 from which the tissue is derived, protects against cancer initiation  
264 (5). Further work by Beerenwinkel et al. using qualitatively similar  
265 models with a single compartment without differentiation from below,  
266 found that the average waiting time for the appearance of the tumor  
267 is strongly affected by the selective advantage, with the average  
268 waiting time decreasing roughly inversely proportional to the selective  
269 advantage. The mutation rate and the size of the population at risk  
270 in contrast were found to contribute only logarithmically to the  
271 waiting time and hence have a weaker impact (6).

274 In hierarchically organized tissues with finite compartment  
275 size the situation is more complicated. A mutant that avoids  
276 early stochastic extinction and achieves a sizable seemingly  
277 stable population can go extinct as a result of differentiation  
278 from below. This results in a qualitatively different and more  
279 profound ability of smaller compartment size to limit the  
280 accumulation of mutations. Similarly to classical population  
281 genetics models, the initial spreading probability of a mutation  
282 in a compartment of a hierarchical tissue is proportional to the  
283 proliferative advantage  $S_m$  and independent of the compartment  
284 size. However, as can be seen in Fig. 3a, the probability of the  
285 mutation to persist in the tissue exhibits a threshold that is  
286 strongly dependent on compartment size. For small compartments  
287 even mutants with a very large selective advantage will only  
288 persist for a very short time, e.g., a mutant with a selective  
289 advantage of 10%, i.e.,  $S_m \approx 0.1$ , the largest value considered  
290 by Beerenwinkel et al., will rapidly go extinct in compartments  
291 with up to several hundred cells.

292 An important exception is constituted by tissue specific  
293 stem cell compartments residing at the bottom of the hierarchy,  
294 such as the stem cells at the bottom of colonic crypts. As these  
295 compartments do not receive an influx of cells from lower levels,  
296 their dynamics can be described by the classical population  
297 genetics models discussed above, i.e., mutations can accumulate  
298 more easily.

299 The derivation of the results presented above relies on the  
300 existence of the potential defined in Eq. (9). In our model this  
301 is ensured by the assumptions that (i) the transition rates for  
302 cells of each type depend only on the number of cells of that  
303 type; and (ii) cell number regulation acts as a multiplicative  
304 rate modifier and depends only on the total number of cells.  
305 There are several biologically relevant violations that must  
306 be considered. In real tissues the first assumption, the  
307 dependence in the absence regulation, is in general violated by

308 mutation of wild type cells into mutant cells (and vice versa),  
309 as this increases the number of mutant cells at a rate dependent  
310 on the number of wild type cells (and vice versa). In the  
311 context of most, if not all, somatic tissues the rate of mutations  
312 that confer significant selective advantage is sufficiently low  
313 that the waiting time between successive mutations is much  
314 longer than the relevant time scale of the dynamics considered  
315 here, thus, it has a negligible effects on the persistence time  
316 and, as a result, it does not effect our conclusions. This is  
317 even more so the case for back mutations from mutants to the  
318 wild type. The second assumption, the postulation of a simple  
319 form of cell number regulation that acts as a multiplicative  
320 modifier and depends only on the total number of cells, is  
321 clearly a simplification. It neglects, for instance, explicit  
322 spatial organization and any potential long term memory, such  
323 as hysteresis of the homeostatic compartment size dependent  
324 on either intrinsic or extrinsic parameters. Such a simplified  
325 form of regulation, however is consistent with more detailed  
326 models of homeostatic tissue size regulation, such as recent  
327 work on the stability of regulation (20–22) and its optimality  
328 in terms of reducing mutation accumulation (23).

329 In order to quantitatively discuss the biological relevance of  
330 our results we must consider relevant values of two parameters:  
331 compartment size ( $N^0$ ) and the strength of the homeostatic  
332 cell-number regulation ( $\beta$ ). Consider for instance the intestinal  
333 crypts. Our knowledge of intestinal crypt organization is most  
334 extensive for murine tissues where crypts are believed to  
335 consist of approximately 250 cells in total, out of which  
336 160–180 are proliferative progenitor cells and 4–8 are stem cells  
337 residing near the bottom of the crypt (24–27). Methods using  
338 bromodeoxyuridine labeling (28), Ki-67 antibody staining (20),  
339 and analysis of methylation patterns (29) conclude that the  
340 crypts in humans contain around 2000 cells with the number  
341 of progenitor cells being between 500 and 700. In the context  
342 of our model, assuming that proliferative cells can be regarded  
343 as belonging to between 1 – 10 discrete levels of progressively  
344 faster dividing cells corresponds to values of  $N^0 \approx 170$  – 17  
345 cells in mice and  $N^0 \approx 600$  – 60 in humans. Experimental  
346 evidence on the strength of cell number regulation is much  
347 more limited. Bravo and Axelrod (20), however have measured  
348 the variation in cell numbers across biopsies in 49 crypts from  
349 human individuals and found a mean of 624 proliferative cells  
350 with a standard deviation of 234. Assuming that (i) all the  
351 proliferative cells belong to a single compartment and (ii) all  
352 of the observed variation across crypts can be attributed to  
353 cell-number fluctuations around a common homeostatic value,  
354 i.e., ignoring completely variation in homeostatic size across  
355 crypts and neglecting measurement error, provides a lower  
356 bound on the strength of regulation of  $\beta \gg 624/234^2 \approx 0.01$ .  
357 The generally well-defined cylindrically symmetric morphology  
358 of crypts, however, suggests that a standard deviation  
359 corresponding to at most 10% of the mean cell number is more  
360 realistic. Assuming between 1 – 10 levels this corresponds to  
361  $1/(62.4 \times 0.1^2) \approx 1.6 > \beta > 1/(624 \times 0.1^2) \approx 0.16$  in human  
362 and  $1/(17 \times 0.1^2) \approx 6 > \beta > 1/(170 \times 0.1^2) \approx 0.6$  in mouse.  
363 This, together with the above values for  $N^0$  places the threshold  
364 selective advantage at between 0.1 and 0.5 in the human  
365 colon and between 0.15 and 0.7 in mouse (cf. Fig. 3b).

366 At present systematic data on the selection advantage of  
367 mutations in somatic tissues is not available. Vermeulen et  
368 al. (7), however, measured the fixation probability of several

369 known drivers of colorectal cancer in the mouse intestine,  
370 finding values between 0.4 (Kras +/−) and 0.75 (Kras G12D),  
371 which are consistent with the above estimates. In the context  
372 of a different epithelial tissue, the human esophagus, a survey  
373 by Martincorena et al. of clones persisting in normal tissue  
374 showed genomic evidence of strong selective advantage of  
375 mutations(30), again consistent with our predictions. Future  
376 data on tissue organization and the selection advantage of  
377 mutations that persist in normal tissue will offer exciting  
378 opportunities to confront them with our results.

### 379 3. Methods

380 Detailed derivation of the results presented above are provided  
381 in the Supplementary Appendix. All data is contained in the  
382 manuscript text and Supplementary Appendix.

383 **ACKNOWLEDGMENTS.** GJSz received funding from the Euro-  
384 pean Research Council under the European Union’s Horizon 2020  
385 research and innovation programme under grant agreement no.  
386 714774 and the grant GINOP-2.3.2.-15-2016- 00057.

- 387 1. Peter C Nowell. The clonal evolution of tumor cell populations. *Science*, 194(4260):23–28,  
388 1976.
- 389 2. Philipp M Altrock, Lin L Liu, and Franziska Michor. The mathematics of cancer: integrating  
390 quantitative models. *Nature Reviews Cancer*, 15(12):730, 2015.
- 391 3. Ivana Bozic, Tibor Antal, Hisashi Ohtsuki, Hannah Carter, Dewey Kim, Sining Chen, Rachel  
392 Karchin, Kenneth W Kinzler, Bert Vogelstein, and Martin A Nowak. Accumulation of driver  
393 and passenger mutations during tumor progression. *Proceedings of the National Academy  
394 of Sciences*, 107(43):18545–18550, 2010.
- 395 4. Christopher D McFarland, Leonid A Mirny, and Kirill S Korolev. Tug-of-war between driver and  
396 passenger mutations in cancer and other adaptive processes. *Proceedings of the National  
397 Academy of Sciences*, 111(42):15138–15143, 2014.
- 398 5. Niko Beerenwinkel, Roland F Schwarz, Moritz Gerstung, and Florian Markowetz. Cancer  
399 evolution: mathematical models and computational inference. *Systematic biology*, 64(1):e1–  
400 e25, 2014.
- 401 6. Niko Beerenwinkel, Tibor Antal, David Dingli, Arne Traulsen, Kenneth W Kinzler, Victor E  
402 Velculescu, Bert Vogelstein, and Martin A Nowak. Genetic progression and the waiting time  
403 to cancer. *PLoS computational biology*, 3(11):e225, 2007.
- 404 7. Louis Vermeulen, Edward Morrissey, Maartje Van Der Heijden, Anna M Nicholson, Andrea  
405 Sottoriva, Simon Buczacck, Richard Kemp, Simon Tavaré, and Douglas J Winton. Defining  
406 stem cell dynamics in models of intestinal tumor initiation. *Science*, 342(6161):995–998,  
407 2013.
- 408 8. Cristian Tomasetti and Bert Vogelstein. Variation in cancer risk among tissues can be ex-  
409 plained by the number of stem cell divisions. *Science (New York, NY)*, 347(6217):78, 2015.
- 410 9. Song Wu, Scott Powers, Wei Zhu, and Yusuf A Hannun. Substantial contribution of extrinsic  
411 risk factors to cancer development. *Nature*, 529(7584):43, 2016.
- 412 10. Benjamin Werner, David Dingli, and Arne Traulsen. A deterministic model for the occurrence  
413 and dynamics of multiple mutations in hierarchically organized tissues. *Journal of The Royal  
414 Society Interface*, 10(85):20130349, 2013.
- 415 11. Martin A Nowak, Franziska Michor, and Yoh Iwasa. The linear process of somatic evolution.  
416 *Proceedings of the national academy of sciences*, 100(25):14966–14969, 2003.
- 417 12. Imre Derényi and Gergely J Szöllösi. Hierarchical tissue organization as a general mecha-  
418 nism to limit the accumulation of somatic mutations. *Nature communications*, 8:14545, 2017.
- 419 13. NTJ Biley. *The elements of stochastic processes*. Wiley, New York, 1964.
- 420 14. John Burdon Sanderson Haldane. A mathematical theory of natural and artificial selection,  
421 part v: selection and mutation. *Mathematical Proceedings of the Cambridge Philosophical  
422 Society*, 23(7):838–844, 1927.
- 423 15. Motoo Kimura and Tomoko Ohta. The average number of generations until fixation of a  
424 mutant gene in a finite population. *Genetics*, 61(3):763, 1969.
- 425 16. Zaheerabbas Patwa and Lindi M Wahl. The fixation probability of beneficial mutations. *Jour-  
426 nal of The Royal Society Interface*, 5(28):1279–1289, 2008.
- 427 17. C Gardiner. *Handbook of stochastic methods for physics, chemistry and natural sciences*.  
428 Springer, Berlin, 2004.
- 429 18. Imre Derényi, Denis Bartolo, and Armand Ajdari. Effects of intermediate bound states in  
430 dynamic force spectroscopy. *Biophysical journal*, 86(3):1263–1269, 2004.
- 431 19. Franziska Michor, Yoh Iwasa, and Martin A Nowak. Dynamics of cancer progression. *Nature  
432 reviews cancer*, 4(3):197, 2004.
- 433 20. Rafael Bravo and David E Axelrod. A calibrated agent-based computer model of stochastic  
434 cell dynamics in normal human colon crypts useful for in silico experiments. *Theoretical  
435 Biology and Medical Modelling*, 10(1):66, 2013.
- 436 21. Natalia L Komarova and P Van Den Driessche. Stability of control networks in autonomous  
437 homeostatic regulation of stem cell lineages. *Bulletin of mathematical biology*, 80(5):1345–  
438 1365, 2018.
- 439 22. Jienian Yang, David E Axelrod, and Natalia L Komarova. Determining the control networks  
440 regulating stem cell lineages in colonic crypts. *Journal of theoretical biology*, 429:190–203,  
441 2017.

23. Cesar Alvarado, Nicole A Fider, Helen J Wearing, and Natalia L Komarova. Optimizing home-  
442 ostatic cell renewal in hierarchical tissues. *PLoS computational biology*, 14(2):e1005967,  
443 2018.
24. Christopher S Potten and Markus Loeffler. Stem cells: attributes, cycles, spirals, pitfalls and  
444 uncertainties. lessons for and from the crypt. *Development*, 110(4):1001–1020, 1990.
25. Carmen Pin, Alastair JM Watson, and Simon R Carding. Modelling the spatio-temporal cell  
445 dynamics reveals novel insights on cell differentiation and proliferation in the small intestinal  
446 crypt. *PLoS one*, 7(5):e37115, 2012.
26. Peter Buske, Jörg Galle, Nick Barker, Gabriela Aust, Hans Clevers, and Markus Loeffler. A  
447 comprehensive model of the spatio-temporal stem cell and tissue organisation in the intestinal  
448 crypt. *PLoS computational biology*, 7(1):e1001045, 2011.
27. Peter Barker, Johan H Van Es, Jeroen Kuipers, Pekka Kujala, Maaïke Van Den Born, Miranda  
449 Cozijnsen, Andrea Haegbarth, Jeroen Korving, Harry Begthel, Peter J Peters, et al. Identifi-  
450 cation of stem cells in small intestine and colon by marker gene *Igf5*. *Nature*, 449(7165):  
451 1003, 2007.
28. Christopher S Potten, M Kellett, Stephen A Roberts, DA Rew, and GD Wilson. Measurement  
452 of in vivo proliferation in human colorectal mucosa using bromodeoxyuridine. *Gut*, 33(1):  
453 71–78, 1992.
29. Pierre Nicolas, Kyoung-Mee Kim, Darryl Shibata, and Simon Tavaré. The stem cell population  
454 of the human colon crypt: analysis via methylation patterns. *PLoS computational biology*, 3  
455 (3):e28, 2007.
30. Iñigo Martincorena, Joanna C Fowler, Agnieszka Wabik, Andrew RJ Lawson, Federico Abas-  
456 cal, Michael WJ Hall, Alex Cagan, Kasumi Murai, Krishnaa Mahubani, Michael R Stratton,  
457 et al. Somatic mutant clones colonize the human esophagus with age. *Science*, 362(6417):  
458 911–917, 2018.

## Supplementary Information for

### A compartment size dependent selective threshold limits mutation accumulation in hierarchical tissues

Dániel Grajzel, Imre Derényi, and Gergely J. Szöllősi

Gergely J. Szöllősi  
E-mail: [ssolo@elte.hu](mailto:ssolo@elte.hu)

#### This PDF file includes:

- Supplementary text
- Figs. S1 to S4
- References for SI reference citations

## Supporting Information Text

### Sufficient conditions for conservative cell number dynamics

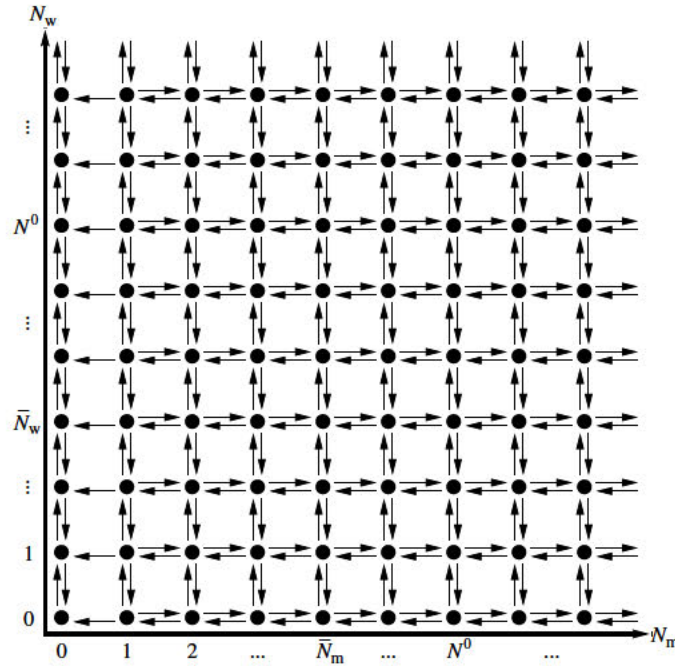

Fig. S1. The state space, where the allowed states  $(N_m, N_w)$  are denoted by black circles, and the transitions with non-zero rates by black arrows.

Consider the cell number dynamics where (i) both the mutant and wild type transition rates depend only on the number of cells of the given type; and (ii) cell number regulation acts as a multiplicative modifier of these rates and depends only on the total number of cells:

$$\begin{aligned} k_m^+(N_m, N_w) &= R_m^+(N_m)\rho^+(N_m + N_w), \\ k_m^-(N_m, N_w) &= R_m^-(N_m)\rho^-(N_m + N_w), \\ k_w^+(N_m, N_w) &= R_w^+(N_w)\rho^+(N_m + N_w), \\ k_w^-(N_m, N_w) &= R_w^-(N_w)\rho^-(N_m + N_w), \end{aligned}$$

where  $R_m^+(N_m)$  and  $R_m^-(N_m)$  indicate the rates of the transitions in the number of mutant cells:  $N_m \rightarrow N_m + 1$  and  $N_m \rightarrow N_m - 1$ , respectively, and  $R_w^+(N_w)$  and  $R_w^-(N_w)$  indicate the rates of the transitions of wild type cells:  $N_w \rightarrow N_w + 1$  and  $N_w \rightarrow N_w - 1$ . The state space of the tissue compartment under consideration is depicted in Fig. S1, where all the transitions with nonzero rates are indicated by arrows. Starting from an arbitrary population state  $N_m = i$ ,  $N_w = j$  the product of the equilibrium constants (i.e., the ratios between to forward and backward rates) along an elementary cycle  $(i, j) \rightarrow (i, j + 1) \rightarrow (i - 1, j + 1) \rightarrow (i - 1, j) \rightarrow (i, j)$  is unity:

$$\begin{aligned} &\frac{k_m^+(i, j)}{k_w^-(i, j + 1)} \times \frac{k_m^-(i, j + 1)}{k_m^+(i - 1, j + 1)} \times \frac{k_w^-(i - 1, j + 1)}{k_w^+(i - 1, j)} \times \frac{k_m^+(i - 1, j)}{k_m^-(i, j)} = \\ &= \frac{R_w^+(j)\rho^+(i + j)}{R_w^-(j + 1)\rho^-(i + j + 1)} \times \frac{R_m^-(i)\rho^-(i + j + 1)}{R_m^+(i - 1)\rho^+(i + j)} \times \frac{R_w^-(j + 1)\rho^-(i + j)}{R_w^+(j)\rho^+(i + j - 1)} \times \frac{R_m^+(i - 1)\rho^+(i + j - 1)}{R_m^-(i)\rho^-(i + j)} = \\ &= \left( \frac{R_w^+(j)}{R_w^-(j + 1)} \frac{R_w^-(j + 1)}{R_w^+(j)} \right) \times \left( \frac{R_m^-(i)}{R_m^+(i - 1)} \frac{R_m^+(i - 1)}{R_m^-(i)} \right) \times \left( \frac{\rho^+(i + j)}{\rho^-(i + j + 1)} \frac{\rho^-(i + j + 1)}{\rho^+(i + j)} \frac{\rho^-(i + j)}{\rho^+(i + j - 1)} \frac{\rho^+(i + j - 1)}{\rho^-(i + j)} \right) = \\ &= (1) \times (1) \times (1) = 1. \end{aligned}$$

This is equivalent to Kolmogorov's criterion, and it follows that the cell number dynamics is conservative and described by a potential.



More generally, consider an evolutionary dynamics with an arbitrary number of cell types in a potential. Similarly to the above derivation, it can be shown that if the cell number increasing and decreasing rates for any subset of cell types are multiplied by, respectively, cell number increasing and decreasing rate modifiers that depend only on the total number of cells of the given subset, then the resulting dynamics is also described by a potential. Moreover, the resulting potential is the sum of the two potentials corresponding to the original dynamics and to the rate modifiers. This is because (i) along any path in the state space the product of the equilibrium constants can be factored into the products of the equilibrium constants corresponding to the original dynamics and to the rate modifiers; and (ii) along any elementary cycle both products are unity. As a corollary, if the transition rates of an evolutionary dynamics are factorizable into functions such that each function corresponds to the increase or decrease of the number of cells of a subset of cell types, and each function depends only on that cell number, then the dynamics is conservative and described by a potential.

### Derivation of the potential $\Psi(N_m, N_w)$

For the transition rates considered in the main text, the potential  $\Psi(N_m, N_w)$  corresponding to the dynamics can be calculated as the logarithm of the product of the equilibrium constants from point  $(N_m, N_w)$  to a reference point, e.g., to the lower left state  $(1, 0)$  of the reversible part of the state space, up to an additive constant. Taking the path  $(N_m, N_w) \rightarrow (1, N_w) \rightarrow (1, 0)$ , this product can be written as:

$$\begin{aligned}
 \exp[\Psi(N_m, N_w) - \Psi(1, 0)] &= \\
 &= \prod_{i=1}^{N_m-1} \frac{k_m^-(i+1, N_w)}{k_m^+(i, N_w)} \prod_{j=0}^{N_w-1} \frac{k_w^-(1, j+1)}{k_w^+(1, j)} = \\
 &= \prod_{i=1}^{N_m-1} \frac{(i+1)r^-}{ir_m^+} \prod_{j=0}^{N_w-1} \frac{(j+1)r^-}{jr^+ + \delta^+} \exp[U(N_m + N_w) - U(1)] = \\
 &= \left(\frac{r^-}{r_m^+}\right)^{(N_m-1)} N_m \left(\frac{r^-}{r^+}\right)^{N_w} \prod_{j=1}^{N_w} \frac{j}{\delta^+/r^+ + j - 1} \exp[U(N_m + N_w) - U(1)] = \\
 &= \left(\frac{r^-}{r_m^+}\right)^{(N_m-1)} N_m \left(\frac{r^-}{r^+}\right)^{N_w} \frac{\Gamma(N_w + 1)}{\Gamma(\delta^+/r^+ + N_w)\Gamma(\delta^+/r^+)} \exp[U(N_m + N_w) - U(1)] = \\
 &= \left\{ \left(\frac{r^-}{r_m^+}\right)^{N_m} N_m \left(\frac{r^-}{r^+}\right)^{N_w} \frac{\Gamma(N_w + 1)}{\Gamma(\delta^+/r^+ + N_w)} \exp[U(N_m + N_w)] \right\} / \left\{ \left(\frac{r^-}{r_m^+}\right)^1 \frac{\Gamma(1)}{\Gamma(\delta^+/r^+)} \exp[U(1)] \right\} = \\
 &= \left\{ \left(\frac{r^-}{r_m^+}\right)^{N_m} N_m \left(\frac{r^-}{r^+}\right)^{N_w} \frac{\Gamma(N_w + 1)}{\Gamma(N^0(e^{-\phi} - 1) + N_w)} \exp[U(N_m + N_w)] \right\} / \left\{ \left(\frac{r^-}{r_m^+}\right)^1 \frac{\Gamma(1)}{\Gamma(N^0(e^{-\phi} - 1))} \exp[U(1)] \right\},
 \end{aligned}$$

where  $\Gamma$  represents the gamma function and in the last step we use equations (1) and (5) of the main text. The logarithm of the numerator (between the braces) results in the formula for  $\Psi(N_m, N_w)$  given in Eq. (9) of the main text, while the logarithm of the denominator is identical to  $\Psi(1, 0)$ .

### Mean exit time

The derivation of the mean exit time from the effective potential well near the quasi-stationary state  $(\bar{N}_m, \bar{N}_w)$  to the boundary line corresponding to zero mutants ( $N_m = 0$ ) is outlined below. Exact analytical formula exists either for continuous systems of arbitrary dimensions (subsections 5.2.7 and 9.3.2 of Gardiner (1)), or discrete systems in one dimension (section 7.4 of Gardiner (1) and Derényi et al. (2)). One can, however, generalize the discrete one-dimensional formula to our discrete two-dimensional system in a straightforward manner.

Let us first select any of the shortest paths (with only upward and leftward transitions) from  $(\bar{N}_m, \bar{N}_w)$  through  $(1, N^0)$  to  $(0, N^0)$ . The main contribution to the mean exit time (which, in one dimension, is often referred to as “mean first passage time”) along this one-dimensional path comes from the product of all backward transition rates (except for the outermost one from  $(0, N^0)$  to  $(1, N^0)$ ) divided by the product of all forward transition rates (including the one from  $(1, N^0)$  to  $(0, N^0)$ ). This

contribution is independent of the selected path (because the rates correspond to an effective potential,  $\Psi(N_m, N_w)$ ):

$$\tau_{\text{main}} = \frac{1}{k_m^-(1, N^0)} \exp(\Delta\Psi),$$

where

$$\Delta\Psi = \Psi(1, N^0) - \Psi(\bar{N}_m, \bar{N}_w)$$

is the height of the effective potential barrier against escape.

The mean exit time involves the sum of similar contributions between any pairs of states along the selected path (section 7.4 of Gardiner (1) and Derényi et al. (2)). Only those contributions are significant for which the starting and ending positions are close to the bottom and the top of the effective potential, respectively. The summation for these contributions leads to a correction factor to the main contribution. This correction factor consists of two terms: a sum of the  $\exp\{-[\Psi(N_m, N_w) - \Psi(\bar{N}_m, \bar{N}_w)]\}$  Boltzmann weights of the states  $(N_m, N_w)$  along the path near the bottom; and a conceptually similar sum near the top (not detailed here, because its terms cannot be readily expressed by the potential  $\Psi$ , but rather only by the products of the ratios of the corresponding transition rates).

Because a typical exit process follows the diagonally oriented potential valley of the state space (see Fig. 2 in the main text), let us restrict the selected path to run along this valley. The correction factor for such a path will depend only on the local “geometry” of the bottom and the top of the effective potential, parallel to the direction of the main valley. In particular, the correction factor at the top (which is the effective width of the potential barrier) can be approximated as

$$C_{\text{top}}^{\parallel} = \frac{1}{S_m}.$$

This one-dimensional result can be generalized to two (or any higher) dimensions in analogy to the generalization of the one-dimensional continuous version of the mean exit time (see subsection 9.3.2 of Gardiner (1)): the sum of the above Boltzmann weights should be extended to all states near the bottom of the effective potential:

$$C_{\text{bottom}} = \sum_i \sum_j \exp\{-[\Psi(i, j) - \Psi(\bar{N}_m, \bar{N}_w)]\};$$

and the result should be divided by the sum of a different type of Boltzmann weights for all the states along the exit line,  $N_m = 1$  (which gives the effective width of the potential saddle at the barrier):

$$C_{\text{top}}^{\perp} = \sum_j \exp\{-[\Psi(1, j) - \Psi(1, N^0)]\}.$$

The resulting mean exit time

$$\tau = \tau_{\text{main}} \frac{C_{\text{bottom}} C_{\text{top}}^{\parallel}}{C_{\text{top}}^{\perp}} = \frac{1}{k_m^-(1, N^0)} \frac{C_{\text{bottom}} C_{\text{top}}^{\parallel}}{C_{\text{top}}^{\perp}} \exp(\Delta\Psi)$$

is proportional to  $\exp(\Delta\Psi)$  and its prefactor, denoted by  $\tau_0$ , is often referred to as the reciprocal of the attempt frequency. The summations can be approximated by closed formulas using quadratic approximations for the effective potential near the bottom and the top. However, to achieve higher accuracy we executed the summations numerically for displaying the theoretical estimates in the figures of both the main text and the Supplementary Information.

## Simulations

Two types of simulations were developed to study the cell dynamics and measure the persistence probability of mutants in hierarchically organized tissues:

**Explicit kinetics.** We performed explicit kinetic Monte Carlo simulations (also known as the “Gillespie algorithm”), where the number of mutants  $N_m$  and wild type cells  $N_w$  evolved according to the rates described in Eq. (8) of the main text. At each iteration, rates were calculated based on the current value of  $N_m$  and  $N_w$ , one of the four possible events was chosen proportional to its rate, and  $N_m$  or  $N_w$  was changed accordingly, while time was increased by the reciprocal of the sum of the four rates. The simulations were started with  $N_m = 0$  and  $N_w = N^0$ . At time  $t = 20000$ , measured in units of  $1/(2r^- N^0)$ , a single mutant was introduced by setting  $N_m = 1$ . The simulations were stopped after reaching time  $T = 10^9$ . Data used in Fig. 2 of the main text were generated using the explicit kinetic simulation.



**Efficiently measuring the persistence probability.** The time evolution of the probability distribution  $P_{i,j}(t)$  of the number of ( $i$  mutant and  $j$  wild type) cells is described by the master equation defined by the transition rates given in Eq. (8) of the main text. The inward and outward probability currents into and out of state  $(i, j)$  can be written, respectively, as

$$J_{i,j}^{\text{in}}(t) = k_m^+(i-1, j)P_{i-1,j}(t) + k_m^-(i+1, j)P_{i+1,j}(t) + k_w^+(i, j-1)P_{i,j-1}(t) + k_w^-(i, j+1)P_{i,j+1}(t),$$

$$J_{i,j}^{\text{out}}(t) = [k_m^-(i, j) + k_m^+(i, j) + k_w^-(i, j) + k_w^+(i, j)] P_{i,j}(t).$$

To efficiently measure the spreading probability ( $S_m$ ) and the mean exit time of escape from the quasi-stationary state ( $\tau$ ), we calculated the steady state probability distributions for the following two modified process:

**Process I.** The process starts with a single mutant and  $N^0$  wild type cells (green circle in Fig. S2), and each time mutants would either go extinct (red arrows in Fig. S2) or spread and reach their quasi-stationary number  $\bar{N}_m$  (blue arrows in Fig. S2), the process is restarted in the  $(1, N^0)$  state.

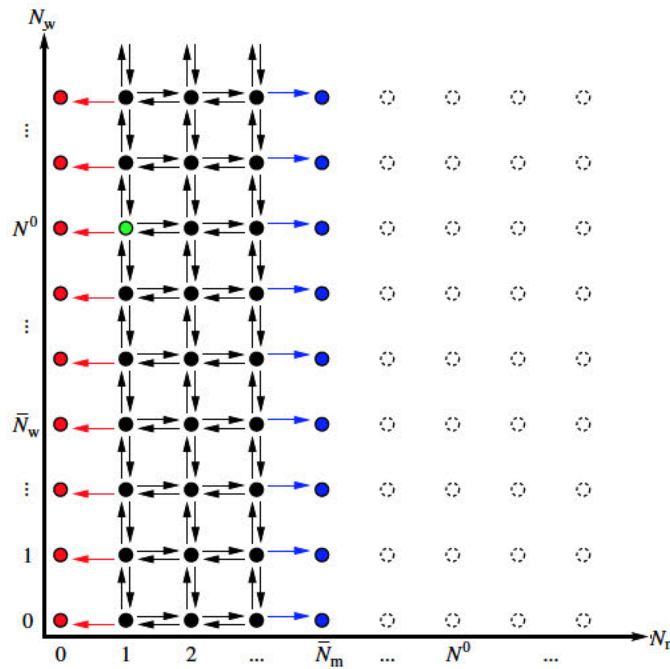

Fig. S2. The state space corresponding to Process I.

The extinction and spreading currents can be defined, respectively, as:

$$J^{\text{ext}}(t) = \sum_{j=0}^{\infty} k_m^-(1, j)P_{1,j}(t),$$

$$J^{\text{spread}}(t) = \sum_{j=0}^{\infty} k_m^+(\bar{N}_m - 1, j)P_{\bar{N}_m-1,j}(t).$$

Thus the master equation of the process for the states with more than 0 but less than  $\bar{N}_m$  mutants (solid black and green circles in Fig. S2) is:

$$\frac{d}{dt} P_{i,j}(t) = J_{i,j}^{\text{in}}(t) - J_{i,j}^{\text{out}}(t) + \delta_{i,1}\delta_{j,N^0} [J^{\text{ext}}(t) + J^{\text{spread}}(t)],$$

where the Kronecker delta symbol  $\delta_{j,i}$  is 1 if  $j = i$ , and 0 otherwise.

Numerically solving the master equation (using Euler's method and setting a large enough upper bound for the number of wild type cells), the probability distribution together with the extinction and spreading currents converge to their steady state values, denoted by  $\hat{P}_{i,j}$ ,  $\hat{J}^{\text{ext}}$ , and  $\hat{J}^{\text{spread}}$ , respectively. The probability that a single mutant can spread and avoid early stochastic extinction is, thus:

$$\hat{S}_m = \frac{\hat{J}^{\text{spread}}}{\hat{J}^{\text{ext}} + \hat{J}^{\text{spread}}}.$$

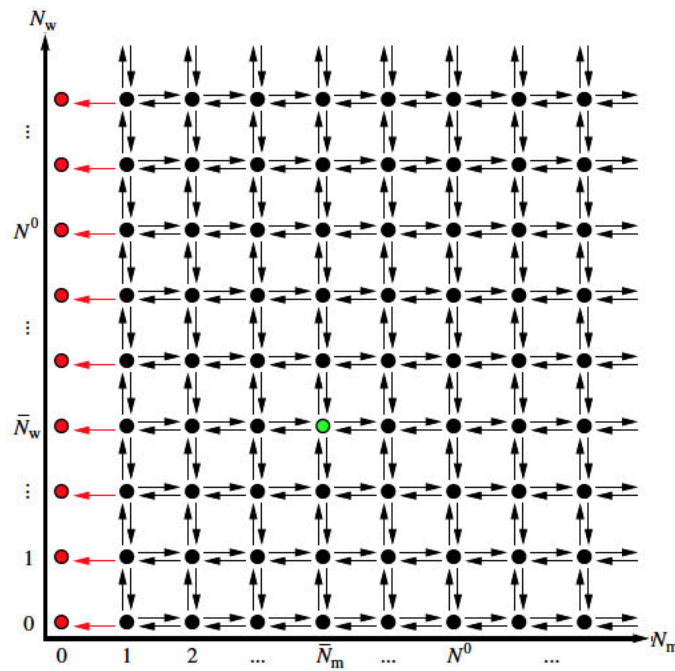

Fig. S3. The state space corresponding to Process II.

**Process II.** The process starts in the quasi-stationary state (green circle in Fig. S3), i.e., with  $\bar{N}_m$  mutants and  $\bar{N}_w$  wild type cells, and each time mutants would go extinct (red arrows in Fig. S3) the process is restarted in the quasi-stationary state  $(\bar{N}_m, \bar{N}_w)$ . With the extinction current

$$J^{\text{ext}}(t) = \sum_{j=0}^{\infty} k_m^-(1, j) P_{1, j}(t)$$

the master equation of the process for all the states with non-zero mutants is:

$$\frac{d}{dt} P_{i, j}(t) = J_{i, j}^{\text{in}}(t) - J_{i, j}^{\text{out}}(t) + \delta_{i, \bar{N}_m} \delta_{j, \bar{N}_w} J^{\text{ext}}(t).$$

Numerically solving the master equation, the probability distribution together with the extinction current converge to their steady state values  $\hat{P}_{i, j}$  and  $\hat{J}^{\text{ext}}$ , respectively. The reciprocal of the steady state extinction current provides the mean exit time of the mutants from the quasi-stationary state:

$$\hat{\tau} = \frac{1}{\hat{J}^{\text{ext}}}.$$

**Persistence probability.** With the combination of the above two processes the probability  $P$  that a single mutant persists (i.e., first spreads, and then avoids escape) for the lifetime  $T$  of the individual can be expressed as:

$$P = \hat{S}_m \exp(-T/\hat{\tau}). \quad [1]$$

Data used for Fig. 3 of the main text and Fig. S4 below were produced by this method.



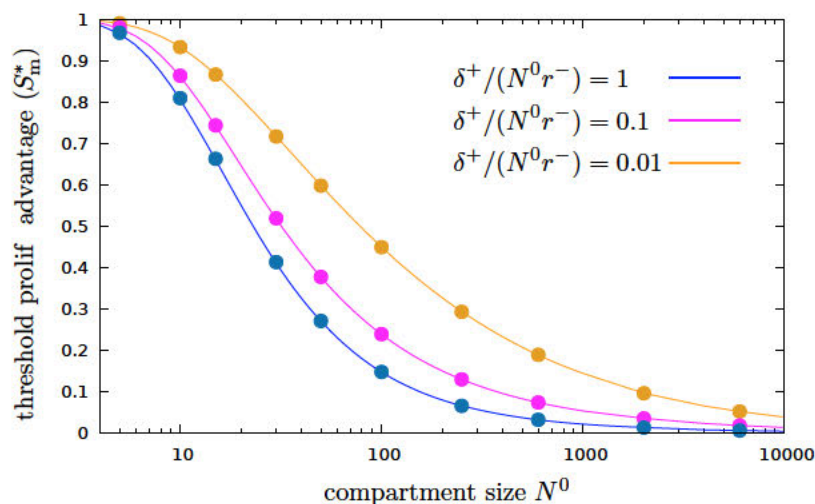

**Fig. S4. The threshold spreading factor for varying strength of washing out, corresponding to  $\delta^+ / (N^0 r^-) = 1, 0.1,$  and  $0.01,$  i.e., to 100%, 10%, and 1% of cells being produced by differentiation from below instead of self-renewal or, equivalently,  $\phi = 1 - \ln[\delta^+ / (N^0 r^-)] \approx -\infty, -0.1,$  and  $-0.01,$  respectively, for  $\beta = 10$  and  $T = 10^9.$  Similarly to Fig. 3b in the main text the threshold spreading factor separates the plot into two distinct regimes: below the curve the persistence probability is close to zero, mutations cannot accumulate; while above the curve mutants that avoid early stochastic extinction, which occurs with probability  $S_m,$  will persist in the tissue during the lifetime of the individual, and can accumulate further mutations leading to neoplastic progression. Continuous lines are theoretical estimates based on the mean exit time approximation, while points indicate explicit numerical simulations.**

## References

1. C Gardiner. *Handbook of stochastic methods for physics, chemistry and natural sciences.* Springer. Berlin, 2004.
2. Imre Derényi, Denis Bartolo, and Armand Ajdari. Effects of intermediate bound states in dynamic force spectroscopy. *Biophysical journal*, 86(3):1263–1269, 2004.
3. Christopher S Potten and Markus Loeffler. Stem cells: attributes, cycles, spirals, pitfalls and uncertainties. lessons for and from the crypt. *Development*, 110(4):1001–1020, 1990.
4. Carmen Pin, Alastair JM Watson, and Simon R Carding. Modelling the spatio-temporal cell dynamics reveals novel insights on cell differentiation and proliferation in the small intestinal crypt. *PLoS one*, 7(5):e37115, 2012.
5. Peter Buske, Jörg Galle, Nick Barker, Gabriela Aust, Hans Clevers, and Markus Loeffler. A comprehensive model of the spatio-temporal stem cell and tissue organisation in the intestinal crypt. *PLoS computational biology*, 7(1):e1001045, 2011.
6. Nick Barker, Johan H Van Es, Jeroen Kuipers, Pekka Kujala, Maaikje Van Den Born, Miranda Cozijnsen, Andrea Haegebarth, Jeroen Korving, Harry Begthel, Peter J Peters, et al. Identification of stem cells in small intestine and colon by marker gene *lgr5*. *Nature*, 449(7165):1003, 2007.
7. Christopher S Potten, M Kellett, Stephen A Roberts, DA Rew, and GD Wilson. Measurement of in vivo proliferation in human colorectal mucosa using bromodeoxyuridine. *Gut*, 33(1):71–78, 1992.
8. Rafael Bravo and David E Axelrod. A calibrated agent-based computer model of stochastic cell dynamics in normal human colon crypts useful for in silico experiments. *Theoretical Biology and Medical Modelling*, 10(1):66, 2013.
9. Pierre Nicolas, Kyoung-Mee Kim, Darryl Shibata, and Simon Tavaré. The stem cell population of the human colon crypt: analysis via methylation patterns. *PLoS computational biology*, 3(3):e28, 2007.
